# Supplementary material for: Application of HPP for the Development of a Dessert Elaborated with Casein and Cocoa for a Dysphagia Diet
Source: MDPI journal article supplement (doi:10.3390/foods12040882), 2023-02-18

**SUPPLEMENTARY MATERIAL Giura et al.**

**Table S1.** Energy content and nutritional composition of 100 g of casein cocoa dessert containing casein

| <b>Characteristics</b>   | <b>Casein (control)</b> |
|--------------------------|-------------------------|
| <b>Energy (KJ/Kcal)</b>  | 314 KJ/74 Kcal          |
| <b>Protein (g)</b>       | 11.46 ± 0.5             |
| <b>Fat (g)</b>           | 0.75 ± 0.1              |
| <b>Carbohydrate (g)*</b> | 4.2                     |
| <b>Sugars (g)</b>        | 3.2 ± 0.3               |
| <b>Fiber (g)</b>         | 2.6 ± 0.5               |
| <b>Ash (g)</b>           | 1.2 ± 0.1               |

\* Calculated by difference

**Table S2.** IDDSI parameters and apparent viscosity at 50 s<sup>-1</sup> shear rate for the untreated and treated protein solutions

| Samples                 | T <sup>o</sup><br>(°C) | Flow<br>test<br>(ml) | Fork Drip Test                                                     |                            | Fork Pressure Test                         |                                                                       |                                                                                                                            | Spoon Tilt Test                            |                                                                         | Spoon Pressure Test                                                                                          | IDDSI<br>Level | Apparent<br>Viscosity<br>(mPa.s) |
|-------------------------|------------------------|----------------------|--------------------------------------------------------------------|----------------------------|--------------------------------------------|-----------------------------------------------------------------------|----------------------------------------------------------------------------------------------------------------------------|--------------------------------------------|-------------------------------------------------------------------------|--------------------------------------------------------------------------------------------------------------|----------------|----------------------------------|
|                         |                        |                      | <i>Drips slowly in dollops/strands through the slots of a fork</i> | <i>Pile above the fork</i> | <i>Make a clear pattern on the surface</i> | <i>When pressed with a fork the particles can be easily separated</i> | <i>Pressure from a fork held on its side can be used to 'cut' or break apart or flake this texture into smaller pieces</i> | <i>Easily pours from spoon when tilted</i> | <i>Holds shape on spoon (plop off the spoon if the spoon is tilted)</i> | <i>Pressure from a spoon held on its side can be used to 'cut' or break this texture into smaller pieces</i> |                |                                  |
| Control (C) 10%         | 8                      | 5                    |                                                                    |                            |                                            |                                                                       |                                                                                                                            |                                            |                                                                         |                                                                                                              | 2              | 67.7 ± 0.3                       |
| C 10% + 600 MPa/5 min   | 8                      | NA                   |                                                                    | X                          | X                                          |                                                                       |                                                                                                                            |                                            | X                                                                       |                                                                                                              | 4              | ND                               |
| C 10% + 250 MPa/ 15 min | 8                      | 6                    |                                                                    |                            |                                            |                                                                       |                                                                                                                            |                                            |                                                                         |                                                                                                              | 2              | 103.0 ± 1.1                      |
| Control (C) 12%         | 8                      | 6.5                  |                                                                    |                            |                                            |                                                                       |                                                                                                                            |                                            |                                                                         |                                                                                                              | 2              | 192.1 ± 0.4                      |
| C 12% + 600 MPa/5 min   | 8                      | NA                   |                                                                    |                            |                                            |                                                                       | X                                                                                                                          |                                            |                                                                         | X                                                                                                            | 6              | ND                               |
| C 10% + 250 MPa/ 15 min | 8                      | 9                    | X                                                                  |                            |                                            |                                                                       |                                                                                                                            | X                                          |                                                                         |                                                                                                              | 3              | 1310.4 ± 195.1                   |
| Control (C) 15%         | 8                      | 9                    | X                                                                  |                            |                                            |                                                                       |                                                                                                                            | X                                          |                                                                         |                                                                                                              | 3              | 1203.0 ± 98.8                    |
| C 15% + 600 MPa/5 min   | 8                      | NA                   |                                                                    |                            |                                            |                                                                       | X                                                                                                                          |                                            |                                                                         | X                                                                                                            | 6              | ND                               |
| C 15% + 250 MPa/ 15 min | 8                      | NA                   |                                                                    | X                          |                                            | X                                                                     |                                                                                                                            |                                            | X                                                                       |                                                                                                              | 5              | ND                               |

**C: Casein**

**Figure S1.** Photos of the untreated and treated micellar casein solutions at different concentrations and HPP treatments

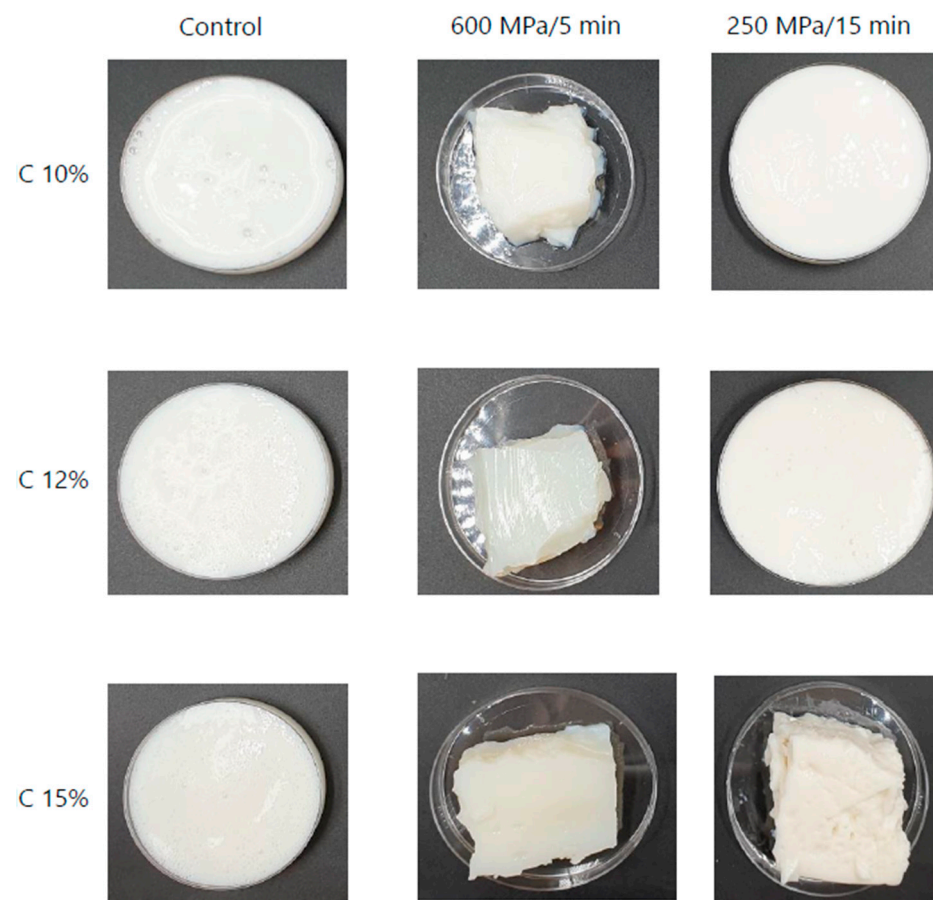

**Figure S2.** IDDSI measurements of the treated casein-enriched cocoa dessert

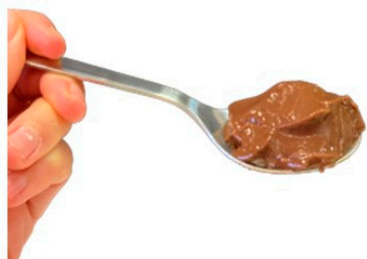

Spoon Tilt Test

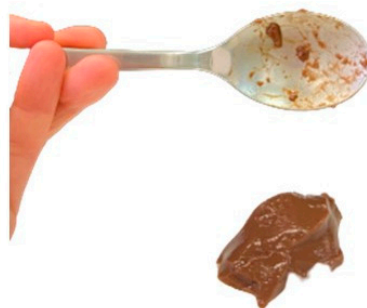

Spoon Tilt Test

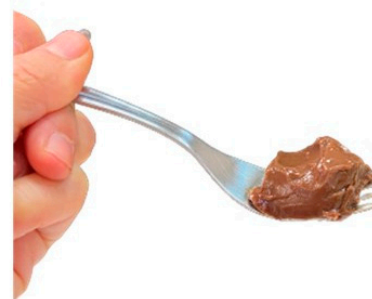

Fork Drip Test

**Figure S3.** Photos of the untreated and treated casein-enriched cacao dessert at different sampling times

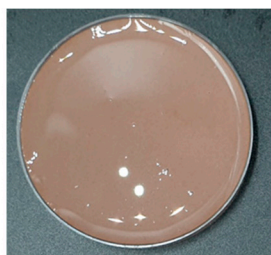

C 10% untreated dessert  
Time 0

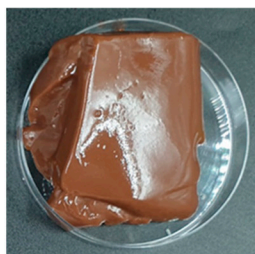

C 10% treated dessert  
Time 0

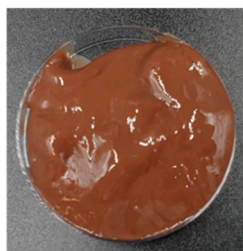

C 10% treated dessert  
Time 14 days

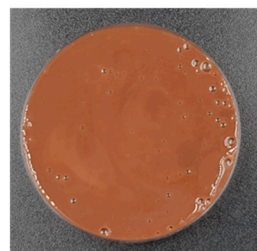

C 10% treated dessert  
Time 28 days

**Figure S4.** Frequency sweep curves of loss tangent of control and HPP treated casein dessert formulations at different sampling time

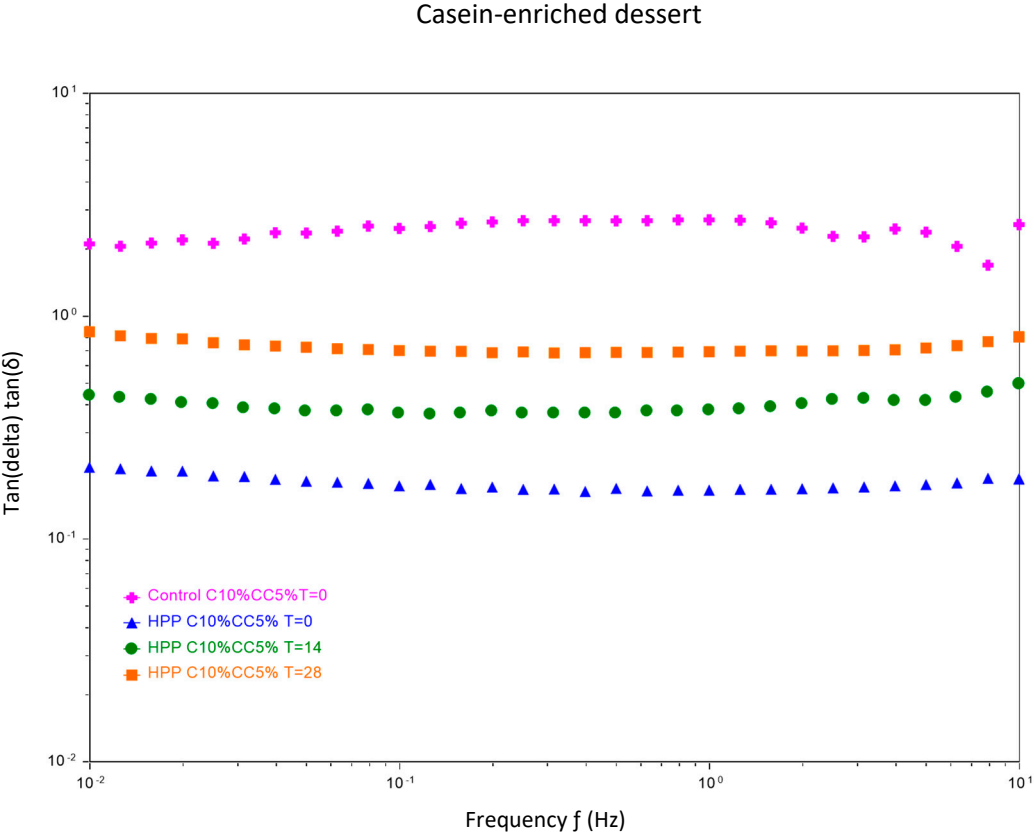

Supplement: s1 [file s1]
